# Supplementary material for: Pentafluoropyridine functionalized novel heteroatom-doped with hierarchical porous 3D cross-linked graphene for supercapacitor applications
Source: Royal Society of Chemistry journal article supplement (doi:10.1039/d1ra03911c), 2021-01-01
Supplement: d1ra03911c1.pdf [file d1ra03911c1.pdf]

**Supplementary information for:**

**Pentafluoropyridine functionalized novel heteroatom-doped with  
hierarchical porous 3D cross-linked graphene for supercapacitor  
applications**

Amit Kumar<sup>1,2</sup>, Chih-Shan Tan<sup>2</sup>, Nagesh Kumar<sup>3</sup>, Pragya Singh<sup>2</sup>, Yogesh Sharma<sup>3</sup>,  
Jihperng Leu<sup>1</sup>, E-Wen Huang<sup>1</sup>, Tan Winie<sup>4</sup>, Kung-Hwa Wei<sup>1</sup> and Tseung Yuen Tseng,<sup>2\*</sup>

<sup>1</sup>Department of Materials Science and Engineering, National Yang Ming Chiao Tung University, Hsinchu 300, Taiwan.

<sup>2</sup>Institute of Electronics, National Yang Ming Chiao Tung University, Hsinchu 300, Taiwan.

<sup>3</sup>Centre of Nanotechnology, I.I.T. Roorkee, Roorkee 247667, India

<sup>4</sup>Faculty of Applied Sciences, Universiti Teknologi MARA, 40450 Shah Alam, Selangor, Malaysia

\*Corresponding Author: Tseung Yuen Tseng: E-mail: [tseng@nctu.edu.tw](mailto:tseng@nctu.edu.tw);

Tel: +886-3-5731879

## **Supporting Information;**

XRD pattern of graphene oxide (GO) (Fig. S1), Raman spectra of GO (Fig. S2), EDX spectrum of a small physical area and inset shows the elemental composition of the NPF0.3 sample (Fig. S3), HRTEM images of NPF0.3 sample (Fig. S4), Resistance and the electrical conductivity of rGO, PG, NFG, and NPF0.3 samples (Fig. S5), Randles curves and the corresponding diffusion coefficients for rGO and NPF0.3 samples (Fig. S6), CVs of the NPF0.3 electrode (at 25 mVs<sup>-1</sup>) and the change in specific capacitance as a function of pentafluoropyridine content for as-prepared NPF0.3 electrodes (Fig. S7), CVs of the PG electrode (at 25 mVs<sup>-1</sup>) and the change in specific capacitance as a function of Phytic acid (PA) content for as-prepared PG electrodes (Fig. S8), Nyquist plot of the device and inset showing the corresponding equivalent circuit diagram after 10000<sup>th</sup> charge/discharge long cycles (Fig. S9), Brief summary of electrochemical properties of samples (Table S1), Electrochemical performance of the NPF0.3 electrode compared with other recently reported results in the literature (Table S2) are all shown below.

1. XRD analysis of Graphene Oxide (GO)

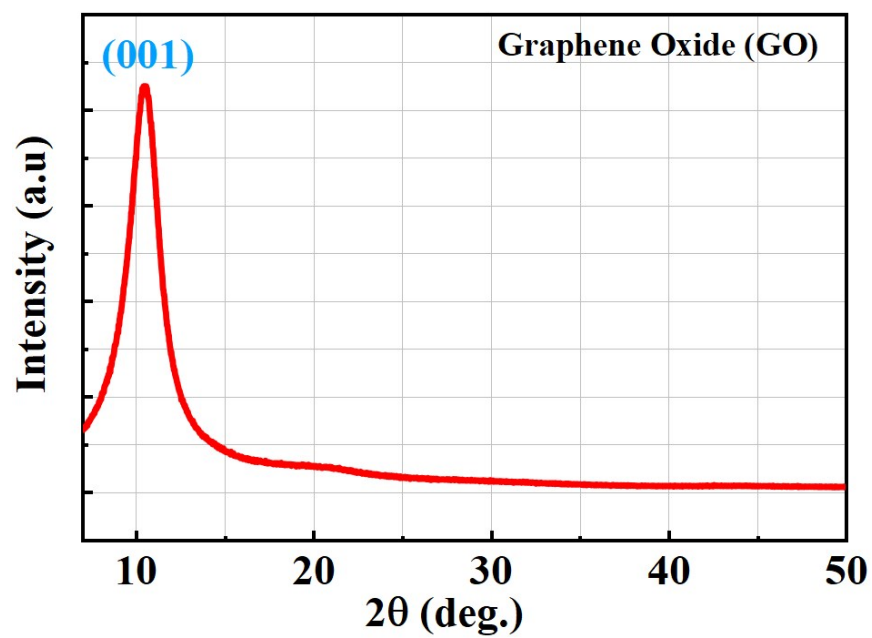

Figure S1. XRD pattern of graphene oxide (GO).

## 2. Raman analysis of Graphene Oxide (GO)

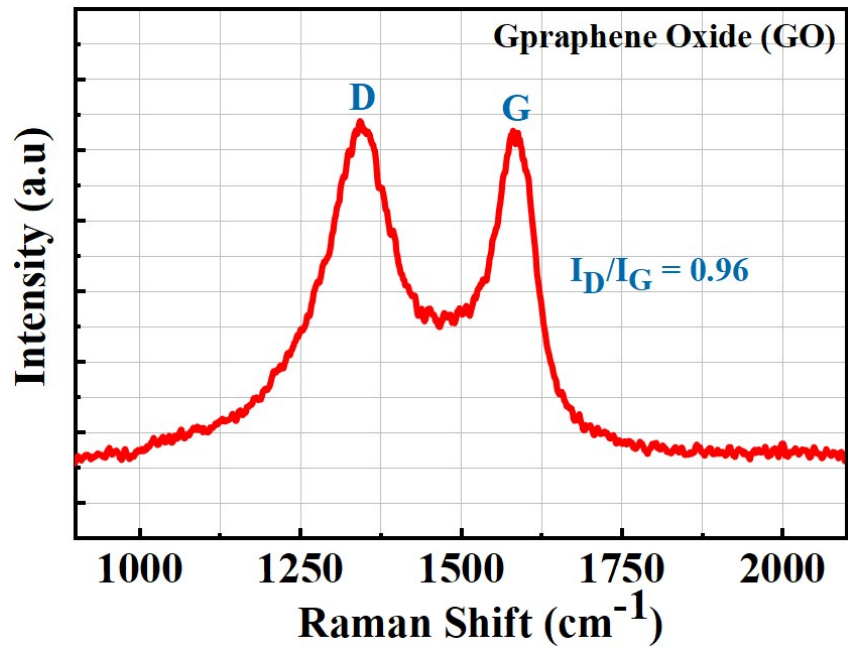

**Figure S2.** Raman spectra of graphene oxide (GO).

### 3. EDX spectrum of NCFG-0.3

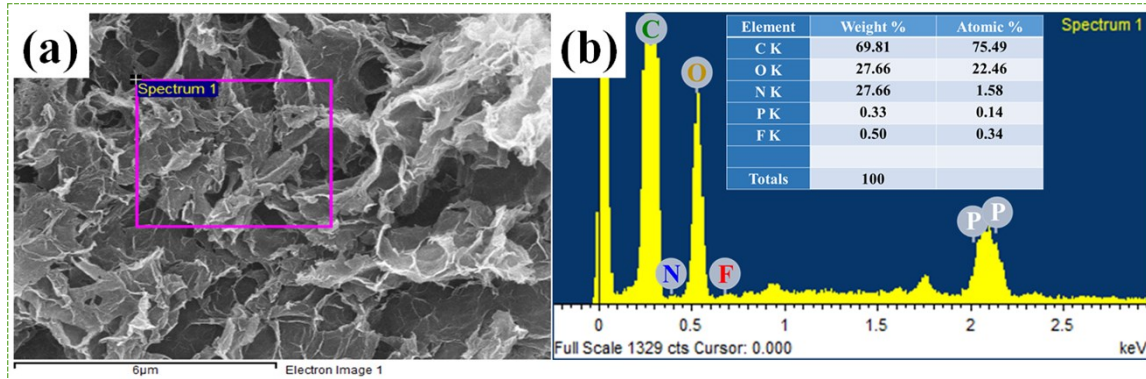

**Figure S3.** (a) EDX examination of a small physical area and (b) The inset shows the elemental composition of the NCFG-0.3 sample.

#### 4. HRTEM image of NPF0.3

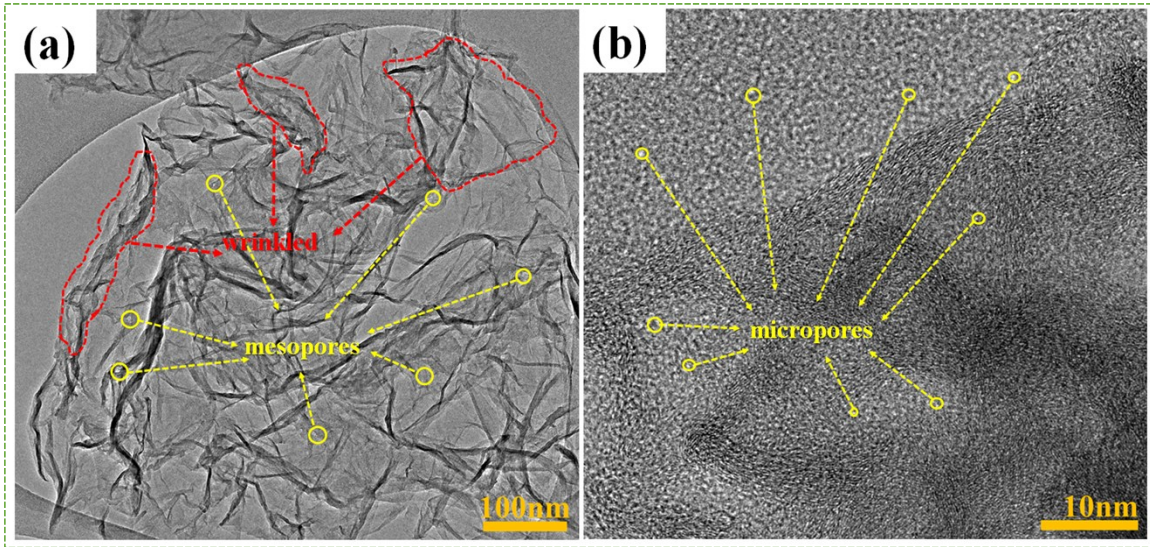

Figure S4. (a-b) HRTEM images of NPF0.3 sample.

## 5. Electrical conductivity measurements

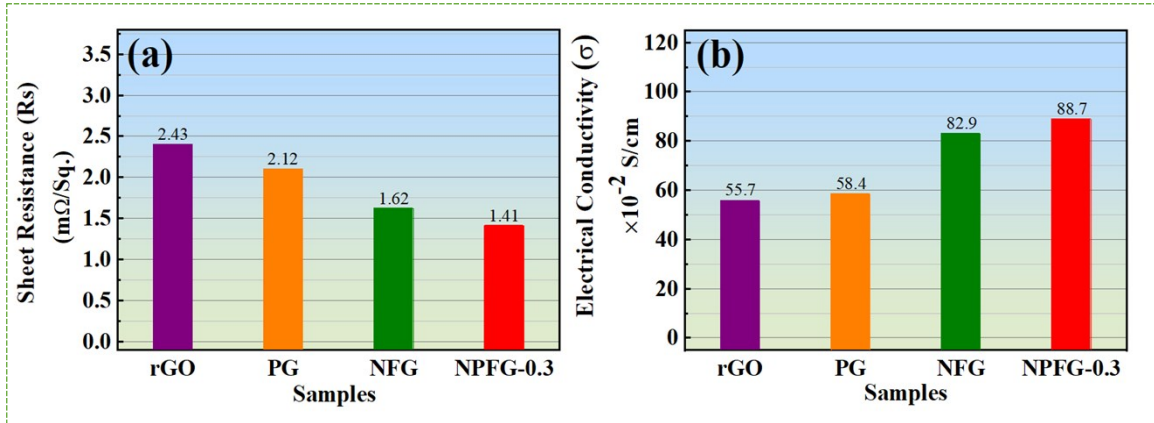

**Figure S5.** (a) Resistance of rGO, PG, NFG and NPFG-0.3 samples, measured via four probe instruments, and (b) the electrical conductivity of the same.

## 6. Calculation of Diffusion coefficient (D)

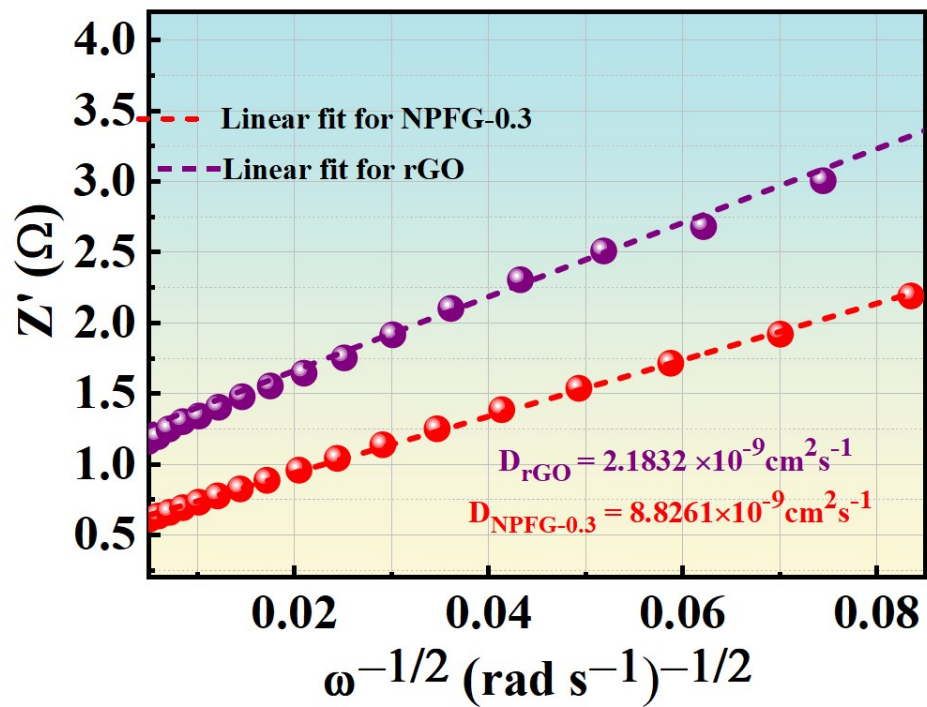

**Figure S6.** Randles curves and the corresponding diffusion coefficients for rGO and NPGF-0.3 samples.



## 7. Optimization of the Pentafluoropyridine content

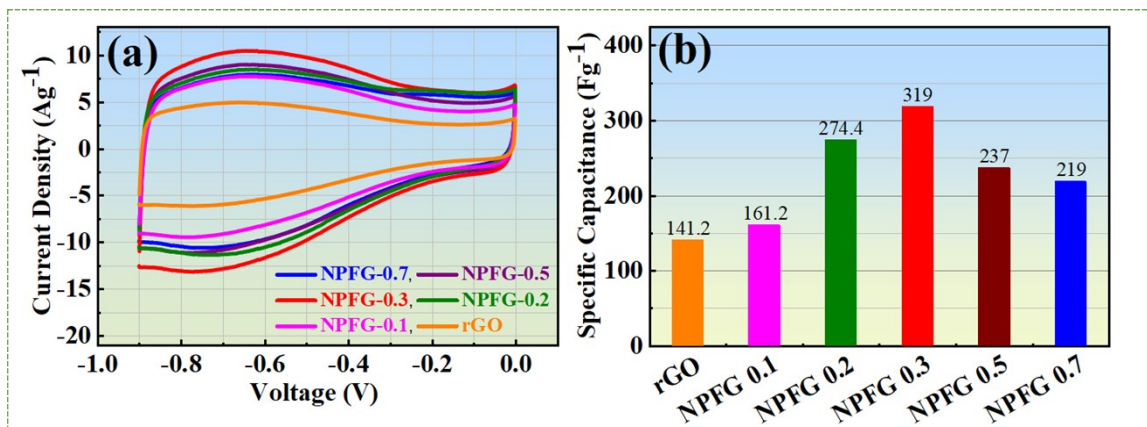

**Figure S7.** Optimization of pentafluoropyridine content (a) CVs of the NPFGE electrode (at  $25 \text{ mVs}^{-1}$ ) with different pentafluoropyridine content from 0.1 to 0.7 mL, and (b) the change in specific capacitance as a function of pentafluoropyridine content for as-prepared NPFGE electrodes.

## 8. Optimization of the Phytic acid (PA) content

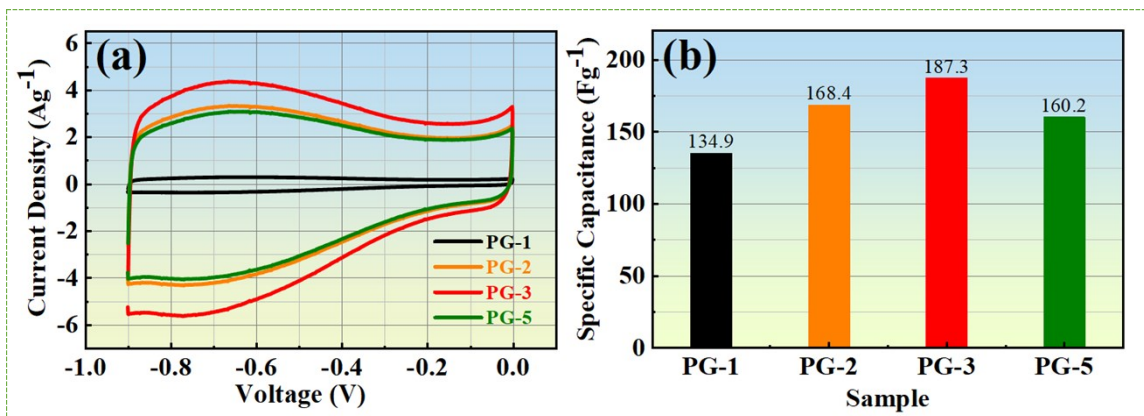

**Figure S8.** Optimization of Phytic acid (PA) content (a) CVs of the PG electrode (at  $25 \text{ mVs}^{-1}$ ) with different Phytic acid content from 1 to 5 mL, and (b) the change in specific capacitance as a function of Phytic acid (PA) content for as-prepared PG electrodes.

9. Nyquist plot of the device after 10,000<sup>th</sup> charge/discharge long cycles.

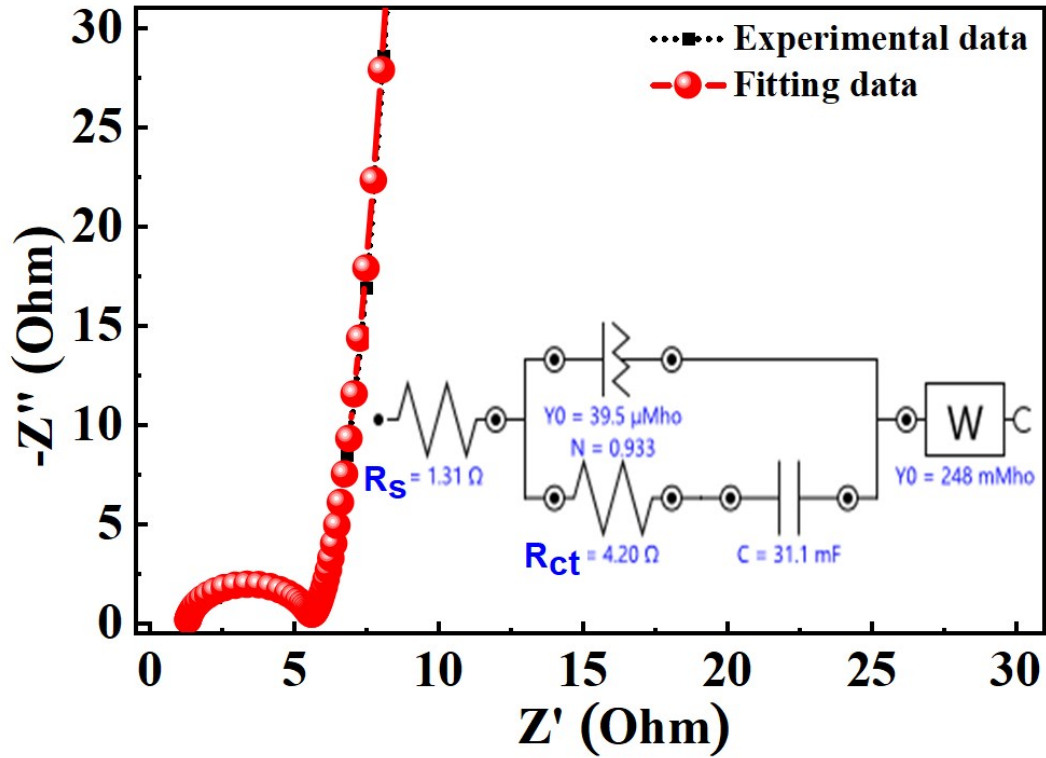

**Figure S9.** Nyquist plot of the device and inset showing the corresponding equivalent circuit diagram after 10000<sup>th</sup> charge/discharge long cycles

**Table S1** Brief summary of electrochemical properties of the samples.

| <b>Sample</b>   | <b>Relaxation time constant<br/>(<math>\tau_0</math>) (ms)</b> | <b>ESR (Rs)<br/>(<math>\Omega</math>)</b> | <b>Discharge time<br/>(s)</b> | <b>Cs (Fg<sup>-1</sup>)<br/>at 0.5 Ag<sup>-1</sup></b> |
|-----------------|----------------------------------------------------------------|-------------------------------------------|-------------------------------|--------------------------------------------------------|
| <b>rGO</b>      | 75.6                                                           | 0.56                                      | 179                           | 161                                                    |
| <b>PG</b>       | 37.6                                                           | 0.54                                      | 236                           | 170                                                    |
| <b>NFG</b>      | 40.7                                                           | 0.5                                       | 311                           | 248                                                    |
| <b>NPFG-0.3</b> | 28.4                                                           | 0.47                                      | 352                           | 319                                                    |

**Table S2** Electrochemical performance of the NPF0.3 electrode compared with other recently reported results in the literature.

| <b>Material</b>                           | <b>SSA<br/>(m<sup>2</sup>g<sup>-1</sup>)</b> | <b>Cs<br/>(F g<sup>-1</sup>)</b> | <b>Scan<br/>rate/Current<br/>density</b> | <b>Electrolyte</b>                | <b>Cycle number<br/>and retention (%)</b> | <b>Ref.</b> |
|-------------------------------------------|----------------------------------------------|----------------------------------|------------------------------------------|-----------------------------------|-------------------------------------------|-------------|
| 3D P-doped graphene                       | 637                                          | 248.8 Fg <sup>-1</sup>           | 1 Ag <sup>-1</sup>                       | 1M H <sub>2</sub> SO <sub>4</sub> | 5000<br>(89.4%)                           | [1]         |
| N, P co-doped graphene                    | 284                                          | 219.8 Fg <sup>-1</sup>           | 0.25Ag <sup>-1</sup>                     | 6M KOH                            | /                                         | [2]         |
| High-density graphene                     | /                                            | 237 Fg <sup>-1</sup>             | 0.1 Ag <sup>-1</sup>                     | 5M KOH                            | 10000<br>(98%)                            | [3]         |
| P-graphene                                | 648                                          | 239 Fg <sup>-1</sup>             | 1 Ag <sup>-1</sup>                       | 6M KOH                            | 5000<br>(83%)                             | [4]         |
| 3D N-doped graphene                       | 757                                          | 175 Fg <sup>-1</sup>             | 0.5 Ag <sup>-1</sup>                     | 6M KOH                            | 5000<br>(87%)                             | [5]         |
| N, B co-doped graphene                    | /                                            | 217.8 Fg <sup>-1</sup>           | 5 mVs <sup>-1</sup>                      | 6M KOH                            | 8800<br>(103%)                            | [6]         |
| N, S, P tri-doped graphene                | 26.7                                         | 295                              | 1 Ag <sup>-1</sup>                       | 2M KOH                            | 10000<br>(93%)                            | [7]         |
| N, S co-doped graphene                    | 252                                          | 251 Fg <sup>-1</sup>             | 0.5 Ag <sup>-1</sup>                     | 6M KOH                            | 2000<br>(95%)                             | [8]         |
| Fluorine-doped graphene                   | 312                                          | 279 Fg <sup>-1</sup>             | 0.5 Ag <sup>-1</sup>                     | 6M KOH                            | 5000<br>(94.3%)                           | [9]         |
| Covalent modified graphene                | 72.2                                         | 287                              | 1 Ag <sup>-1</sup>                       | 6M KOH                            | 1000<br>(94%)                             | [10]        |
| Phenolic hydroxyl functionalized graphene | 321                                          | 284.1 Fg <sup>-1</sup>           | 0.3Ag <sup>-1</sup>                      | 6M KOH                            | 10000<br>(88%)                            | [11]        |

|                                                            |       |                      |                      |        |               |                     |
|------------------------------------------------------------|-------|----------------------|----------------------|--------|---------------|---------------------|
| Alcoholic hydroxyl functionalized graphene                 | 309   | 260 Fg <sup>-1</sup> | 0.3Ag <sup>-1</sup>  | 6M KOH | 10000 (100%)  | [12]                |
| Pentafluoropyridine functionalized 3D graphene (NPPFG-0.3) | 518.2 | 319 Fg <sup>-1</sup> | 0.5 Ag <sup>-1</sup> | 6M KOH | 15000 (99.8%) | <b>In this work</b> |

---

## References

- 1 X.Liu, S.Zou, K.Liu, C.Lv, Z.Wu, Y.Yin, T.Liang and Z.Xie, *J. Power Sources*, 2018, **384**, 214–222.
- 2 K.Xia, Z.Huang, L.Zheng, B.Han, Q.Gao, C.Zhou, H.Wang and J.Wu, *J. Power Sources*, 2017, **365**, 380–388.
- 3 X.Peng, H.Cao, Z.Qin, C.Zheng, M.Zhao, P. Z.Liu, B.Xu, X.Zhou, Z.Liu and J.Guo, *Electrochim. Acta*, 2019, **305**, 56–63.
- 4 L.Wang, H.Tan, J.Chen, H.Zhang, Z.Li and H.Qiu, *Mater. Lett.*, 2019, **252**, 345–348.
- 5 J.Du, L.Liu, Y.Yu, L.Zhang, Y.Zhang and A.Chen, *Mater. Chem. Phys.*, 2019, **223**, 145–151.
- 6 E. C. S. Transactions and T. E. Society, 2018, **85**, 521–530.
- 7 J.Liu, Y.Zhu, X.Chen and W.Yi, *J. Alloys Compd.*, 2020, **815**, 152328.
- 8 J.Li, G.Zhang, C.Fu, L.Deng, R.Sun and C. P. Wong, *J. Power Sources*, 2017, **345**, 146–155.
- 9 T.Jin, J.Chen, C.Wang, Y.Qian and L.Lu, *J. Mater. Sci.*, 2020, **55**, 12103–12113.
- 10 Q.Wang, H.Gao, C.Zhao, H. X. Yue, G.Gao, J.Yu, Y. U.Kwon and Y.Zhao, *Electrochim. Acta*, , DOI:10.1016/j.electacta.2020.137700.
- 11 Y.Zhang, G.Wen, S.Fan, Y.Chu, S.Li, B.Xu and J.Zhang, *J. Power Sources*, 2019, **435**, 226799.
- 12 Y.Zhang, G.Wen, S.Fan, W.Ma, S.Li, T.Wu, Z.Yu and B.Zhao, *Electrochim. Acta*, 2019, **313**, 59–69.
